# Supplementary material for: Base-pairing selectivity of a ureido-linked phenyl-2′-deoxycytidine derivative
Source: Royal Society of Chemistry journal article supplement (doi:10.1039/c2ob26897c), 2012-01-01
Supplement: c2ob26897c.pdf [file c2ob26897c.pdf]

## Supplementary Information

### Base-pairing selectivity of a ureido-linked phenyl-2'-deoxycytidine derivative

Shu-ichi Nakano, Hirohito Oka, Daisuke Yamaguchi, Masayuki Fujii, and Naoki Sugimoto

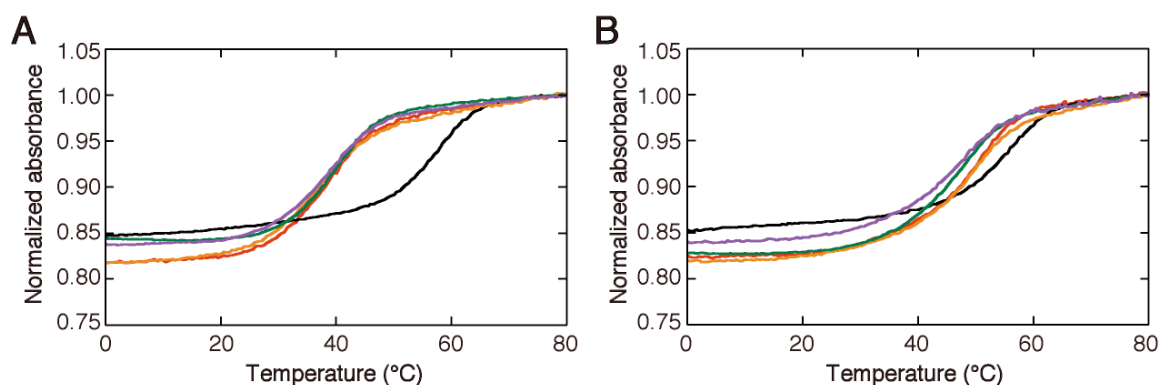

**Figure S1** Thermal melting curves of 11-mer DNA duplexes containing (A) dC/N or (B) dC<sup>phe</sup>/N, where N is dG; black line, dA; purple, dC; orange, dT; green, or dF; red. The data were obtained at an oligonucleotide concentration of 10  $\mu$ M.

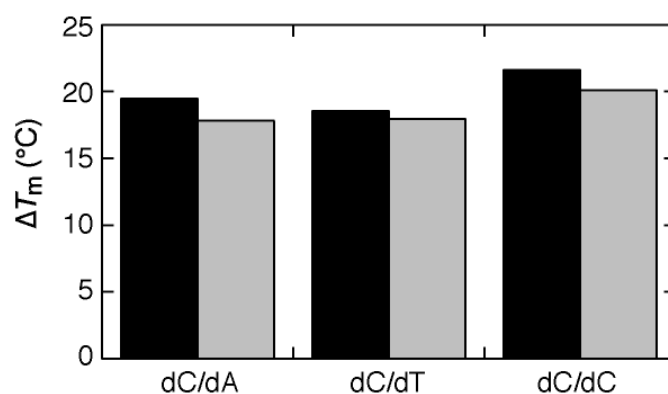

**Figure S2** Differences in  $T_m$  between mismatched duplexes and the duplex containing dC/dG ( $\Delta T_m = T_{m,dC/dG} - T_{m,mismatch}$ ), in the absence (black bars) and presence (gray bars) of 20 wt% PEG. The  $T_m$  was measured at an oligonucleotide concentration of 2  $\mu$ M.
